# Supplementary material for: Impact of Nitric Oxide-Release Kinetics on Antifungal Activity
Source: MDPI journal article supplement (doi:10.3390/jof10050308), 2024-04-24
Supplement: s1 [file s1]

# Impact of Nitric Oxide-Release Kinetics on Antifungal Activity

## Supplementary Information

Quincy E. Grayton,<sup>1</sup> Ivie L. Conlon,<sup>1</sup> Christopher A. Broberg,<sup>1</sup> and Mark H. Schoenfisch<sup>1,2\*</sup>

<sup>1</sup>Department of Chemistry and <sup>2</sup>Eshelman School of Pharmacy, University of North Carolina at Chapel Hill, North Carolina, USA

\*To whom correspondence should be addressed: [schoenfisch@unc.edu](mailto:schoenfisch@unc.edu)

### Contents

|                                                                                                                                                                                                                |   |
|----------------------------------------------------------------------------------------------------------------------------------------------------------------------------------------------------------------|---|
| Figure S1. Real-time NO release of (A) MD3, (B) SPER/NO, (C) DPTA/NO, and (D) DETA/NO. ....                                                                                                                    | 2 |
| Table S1. Minimum inhibitory concentrations (MIC) of commercial antifungals against <i>C. albicans</i> , <i>C. auris</i> , <i>C. neoformans</i> , and <i>A. fumigatus</i> . ....                               | 3 |
| Table S2. MIC of base scaffolds SPER, DPTA, and DETA. ....                                                                                                                                                     | 4 |
| Figure S3. Scanning electron micrographs of (A) spermine treated <i>C. albicans</i> and (B) spermine treated <i>C. auris</i> . ....                                                                            | 5 |
| Figure S2. Scanning electron micrographs of (A) untreated <i>C. neoformans</i> and <i>C. neoformans</i> treated with (B) MD3, (C) SPER/NO, (D) DPTA/NO, and (E) DETA/NO at 10x the MIC for each compound. .... | 5 |
| Table S3. IC50 values of NO-releasing small molecules against AIR-100 EpiAirway Tissues. ....                                                                                                                  | 6 |

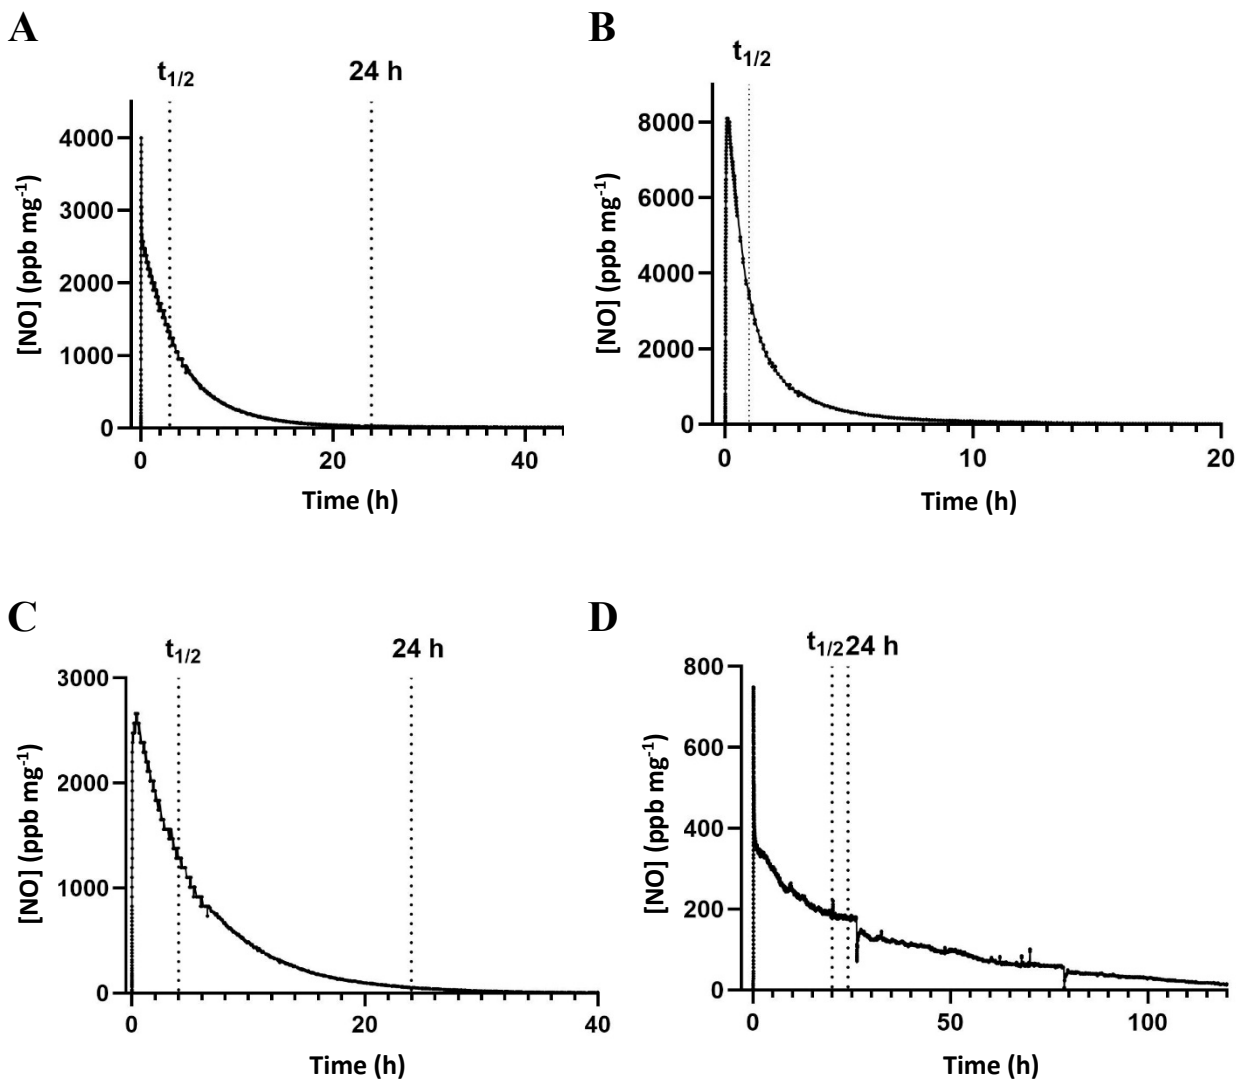

Figure S1. Real-time NO release of (A) MD3, (B) SPER/NO, (C) DPTA/NO, and (D) DETA/NO. Half-life of NO release is indicated by  $t_{1/2}$ .

Table S1. Minimum inhibitory concentrations (MIC) of commercial antifungals against *C. albicans*, *C. auris*, *C. neoformans*, and *A. fumigatus*.<sup>a</sup>

| Strains                            | MIC ( $\mu\text{g mL}^{-1}$ ) |                  |       |                  |       |      |
|------------------------------------|-------------------------------|------------------|-------|------------------|-------|------|
|                                    | CAS                           | FLC              | 5FC   | AMB              | BUT   | MICO |
| <i>C. albicans</i> (ATCC MYA-2876) | 0.25                          | >32 <sup>*</sup> | 0.125 | 0.25             | >4000 | 60   |
| <i>C. auris</i> (ATCC MYA-5001)    | >32 <sup>*</sup>              | >32 <sup>*</sup> | 2     | 0.5              | >4000 | 4    |
| <i>C. neoformans</i> (ATCC 208821) | 32                            | 4                | 4     | 0.195            | 0.3   | 0.5  |
| <i>A. fumigatus</i> (ATCC 1022)    | 125                           | >125             | >62.5 | 2.5 <sup>*</sup> | >500  | >500 |

<sup>a</sup>MIC determined from  $n \geq 3$  experiments. CAS = caspofungin, FLC = fluconazole, 5FC = 5-fluorocytosine, AMB = amphotericin B, BUT = butenafine, MICO = miconazole. <sup>\*</sup>Denotes resistance to antifungal.

Table S2. MIC of base scaffolds SPER, DPTA, and DETA.<sup>a</sup>

| Strains                        | MIC (mg mL <sup>-1</sup> ) |      |      |
|--------------------------------|----------------------------|------|------|
|                                | SPER                       | DPTA | DETA |
| <i>Candida albicans</i>        |                            |      |      |
| ATCC MYA-2876                  | >20                        | 20   | >20  |
| ATCC 18804                     | >20                        | 20   | >20  |
| ATCC 14053                     | 20                         | 20   | >20  |
| <i>Candida auris</i>           |                            |      |      |
| ATCC MYA-5000                  | >20                        | >20  | >20  |
| ATCC MYA-5001                  | >20                        | >20  | >20  |
| ATCC MYA-5003                  | >20                        | >20  | >20  |
| <i>Cryptococcus neoformans</i> |                            |      |      |
| ATCC 208821                    | 5                          | 5    | >20  |
| ATCC MYA-4566                  | 2.5                        | 5    | >20  |
| ATCC MYA-4567                  | 2.5                        | 2.5  | 10   |

<sup>a</sup>Determined from n ≥ 3 experiments.

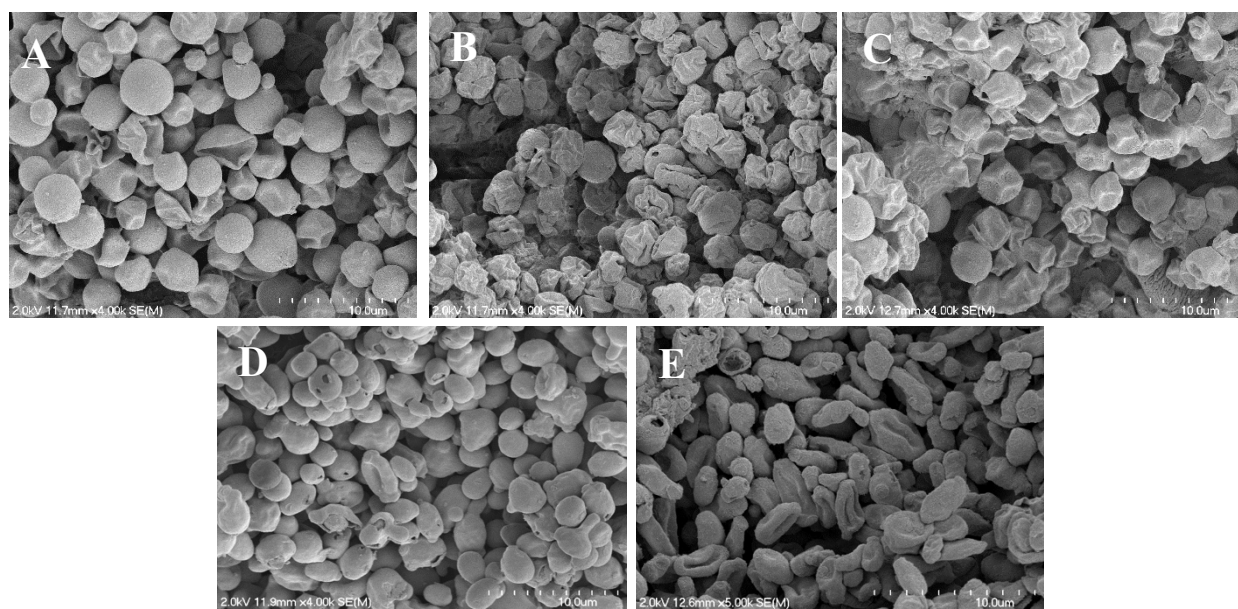

Figure S2. Scanning electron micrographs of (A) untreated *C. neoformans* and *C. neoformans* treated with (B) MD3, (C) SPER/NO, (D) DPTA/NO, and (E) DETA/NO at 10x the MIC for each compound. Images are representative of  $n \geq 3$  separate experiments.

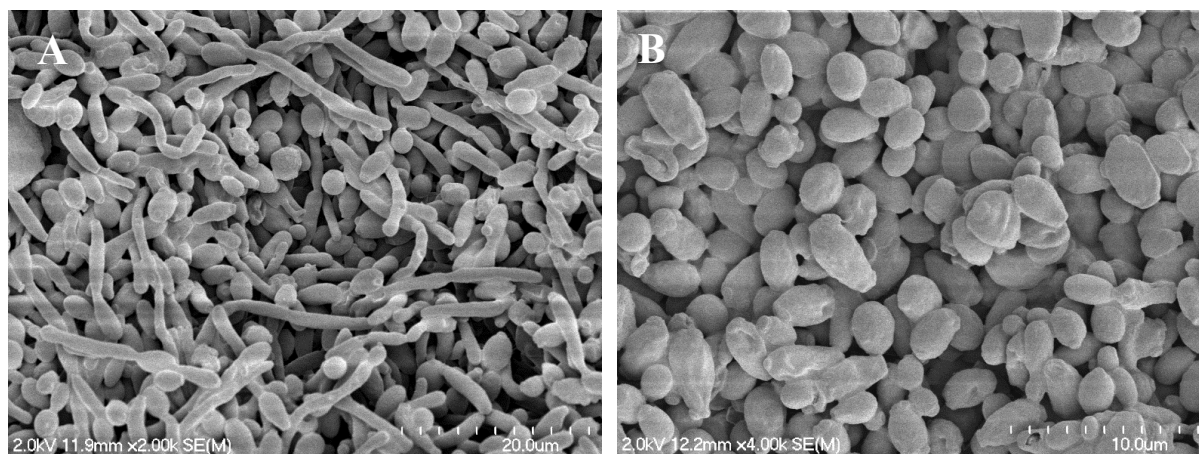

Figure S3. Scanning electron micrographs of (A) spermine treated *C. albicans* and (B) spermine treated *C. auris*. Treatments concentrations were 10x the MIC for each fungal strain. Images are representative of  $n \geq 3$  experiments.

Table S3. IC<sub>50</sub> values of NO-releasing small molecules against AIR-100 EpiAirway Tissues.<sup>a</sup>

| <b>NO donor</b> | <b>IC<sub>50</sub> (μg mL<sup>-1</sup>)</b> |
|-----------------|---------------------------------------------|
| MD3             | 16,000 ± 1,000                              |
| SPER/NO         | 20,000 ± 4,000                              |
| DPTA/NO         | 18,000 ± 2,000                              |
| DETA/NO         | 48,000 ± 7,000                              |

<sup>a</sup>IC<sub>50</sub> determined from n ≥ 3 experiments.
